# Supplementary material for: Water-Blown Polyurethane Foams Showing a Reversible Shape-Memory Effect
Source: MDPI journal article supplement (doi:10.3390/polym8120412), 2016-11-28
Supplement: s1 [file s1]

# Supplementary Materials: Water-Blown Polyurethane Foams Showing a Reversible Shape-Memory Effect

Elena Zharinova, Matthias Heuchel, Thomas Weigel, David Gerber, Karl Kratz and Andreas Lendlein

DMTA Analysis of the Semicrystalline cPCL-PU Foams after Extraction

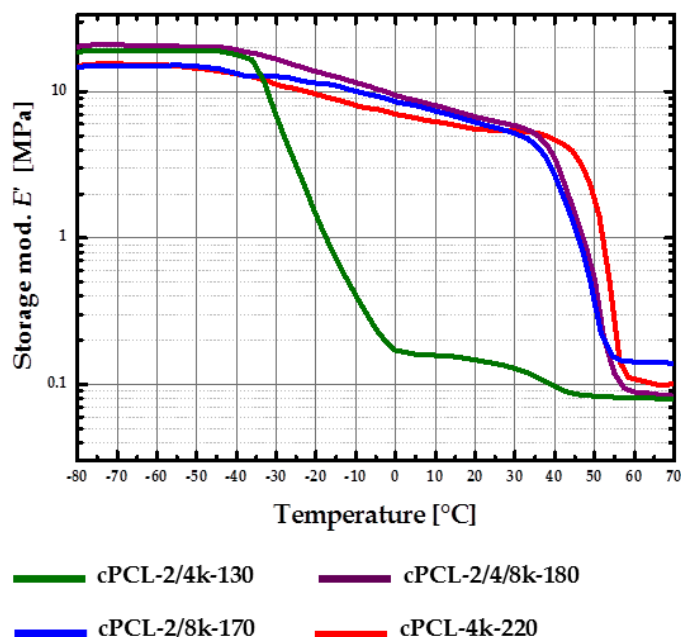

**Figure S1.** Storage modulus dependence on the temperature for semicrystalline foams with different degree of crystallinity after extraction in *N,N*-dimethylformamide (DMF) solvent. PCL: poly( $\epsilon$ -caprolactone).

**Table S1.** Crosslink densities and average molecular weight between physical or chemical crosslinks obtained using Flory and Rehner approach. PCL: poly( $\epsilon$ -caprolactone).

| Composition     | $M_c$ <sup>1</sup><br>(g·mol <sup>-1</sup> ) | $\rho_{cross}$ <sup>2</sup> × 10 <sup>2</sup><br>(mmol·cm <sup>3</sup> ) | $\phi$      | $E'$ at 70 °C<br>(Mpa) |
|-----------------|----------------------------------------------|--------------------------------------------------------------------------|-------------|------------------------|
| cPCL-4k-220     | 16500 ± 1900                                 | 3.2 ± 0.2                                                                | 0.73 ± 0.07 | 0.1 ± 0.01             |
| cPCL-2/4k-130   | 13000 ± 1500                                 | 4.6 ± 0.3                                                                | 0.81 ± 0.09 | 0.079 ± 0.01           |
| cPCL-2/8k-170   | 9000 ± 1000                                  | 8.2 ± 0.6                                                                | 0.83 ± 0.09 | 0.14 ± 0.01            |
| cPCL-2/4/8k-180 | 15000 ± 1800                                 | 4.8 ± 0.3                                                                | 0.85 ± 0.09 | 0.083 ± 0.01           |

<sup>1</sup> calculated using  $G^* = \frac{\rho_{foam} \times RT}{M_c}$ , where  $G^*$  is a shear stress calculated from values of  $E'$  modulus at  $T = 70$  °C obtained from dynamic mechanical thermal analysis (DMTA),  $R$  is the gas constant and  $M_c$  is estimated molecular weight between physical or chemical crosslinks. A Poisson ratio of 0.25 was taken for all formulations to estimate the shear stress; <sup>2</sup> calculated using  $\rho_{cross} = \frac{2}{3} * \frac{\rho_{foam}}{(1-\phi) \times M_c}$ , where  $\rho_{cross}$  stands for crosslink density and  $\rho_{foam}$  is the foam density; 2/3 is the coefficient of functionality for diethanolamine (DEOA); and  $\phi$  is the porosity.

In-Situ Recovery of cPCL-2/4/8k-180 on a Macroscale

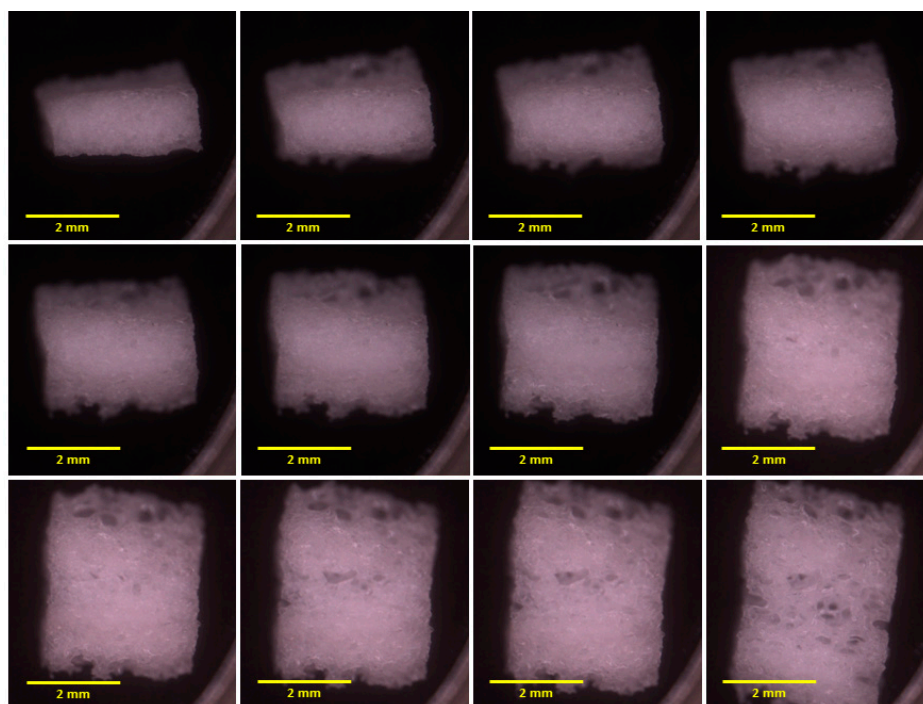

Figure S2. Images of the in-situ recovery process of cPCL-2/4/8k-180 obtained with light microscope.

In-Situ Recovery of “Amorphous” cPCL-2k-110 Foam

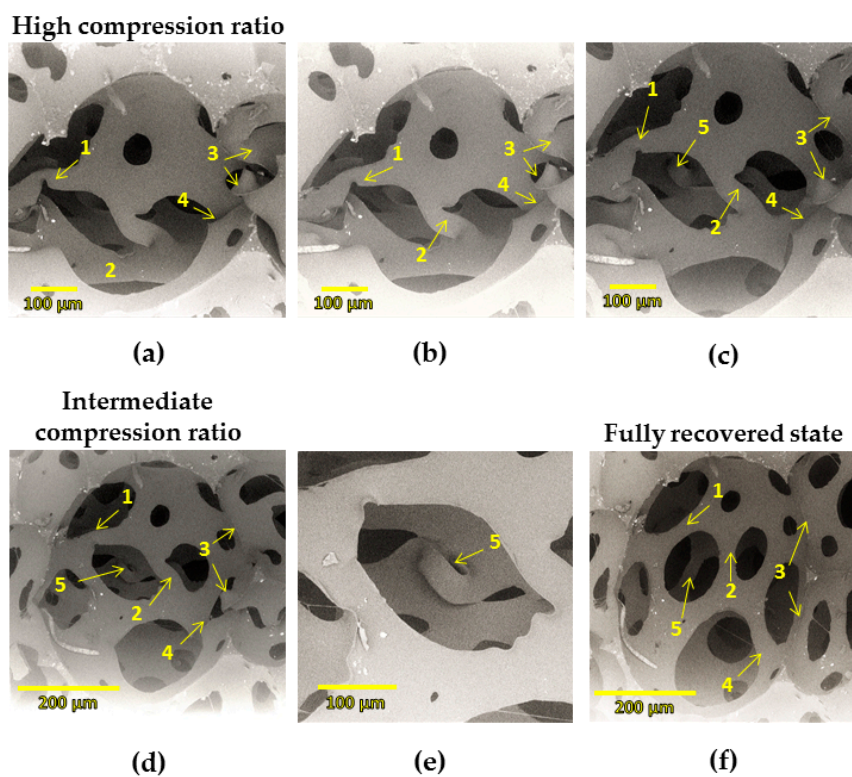

Figure S3. SEM images of stepwise recovery from compressed state (a) of a low density amorphous foam (cPCL-2k-110) up to the full recovered state (f). (e) A magnification of a strut loop (5) in picture (d) at an intermediate compression ratio. Yellow arrows with numbers indicate specific wall elements discussed in the text). Scale bare for images (a–c) and (e) is 100  $\mu\text{m}$ , scale bare for images (d,f) is 200  $\mu\text{m}$ .
